# Supplementary material for: Clinical Grade “SNaPshot” Genetic Mutation Profiling in Multiple Myeloma
Source: PubMed Central journal article supplement (PMC4485483; doi:10.1016/j.ebiom.2014.11.008), 2014-11-18
Supplement: mmc1.pdf [file mmc1.pdf]

Supplemental Table 1: Cancer Gene Mutations Evaluated by the SNaPshot Genotyping Assay

| Gene    | DNA              | AA            |
|---------|------------------|---------------|
| AKT1    | c.49G>A          | p.Glu17Lys    |
| APC     | c.4666_4667insA  | p.Thr1556fs*3 |
|         | c.3340C>T        | p.Arg1114X    |
|         | c.4012C>T        | p.Gln1338X    |
|         | c.4348C>T        | p.Arg1450X    |
| BRAF    | c.1397G>A        | p.Gly466Glu   |
|         | c.1397G>C        | p.Gly466Ala   |
|         | c.1397G>T        | p.Gly466Val   |
|         | c.1406G>A        | p.Gly469Glu   |
|         | c.1406G>C        | p.Gly469Ala   |
|         | c.1406G>T        | p.Gly469Val   |
|         | c.1789C>G        | p.Leu597Val   |
|         | c.1798_1799GT>AA | p.Val600Lys   |
|         | c.1798G>A        | p.Val600Met   |
|         | c.1798G>T        | p.Val600Leu   |
|         | c.1799T>A        | p.Val600Glu   |
|         | c.1799T>C        | p.Val600Ala   |
|         | c.1799T>G        | p.Val600Gly   |
| CTNNB1  | c.101G>A         | p.Gly34Glu    |
|         | c.101G>T         | p.Gly34Val    |
|         | c.109T>A         | p.Ser37Thr    |
|         | c.109T>C         | p.Ser37Pro    |
|         | c.109T>G         | p.Ser37Ala    |
|         | c.110C>A         | p.Ser37Tyr    |
|         | c.110C>G         | p.Ser37Cys    |
|         | c.110C>T         | p.Ser37Phe    |
|         | c.121A>C         | p.Thr41Pro    |
|         | c.121A>G         | p.Thr41Ala    |
|         | c.121A>T         | p.Thr41Ser    |
|         | c.122C>A         | p.Thr41Asn    |
|         | c.122C>G         | p.Thr41Ser    |
|         | c.122C>T         | p.Thr41Ile    |
|         | c.133T>A         | p.Ser45Thr    |
|         | c.133T>C         | p.Ser45Pro    |
|         | c.133T>G         | p.Ser45Ala    |
|         | c.134C>A         | p.Ser45Tyr    |
|         | c.134C>G         | p.Ser45Cys    |
|         | c.134C>T         | p.Ser45Phe    |
| c.94G>A | p.Asp32Asn       |               |
| c.94G>C | p.Asp32His       |               |

|       |                            |                    |
|-------|----------------------------|--------------------|
|       | c.94G>T                    | p.Asp32Tyr         |
|       | c.95A>C                    | p.Asp32Ala         |
|       | c.95A>G                    | p.Asp32Gly         |
|       | c.95A>T                    | p.Asp32Val         |
|       | c.98C>A                    | p.Ser33Tyr         |
|       | c.98C>G                    | p.Ser33Cys         |
|       | c.98C>T                    | p.Ser33Phe         |
| EGFR  | c.2155G>A                  | p.Gly719Ser        |
|       | c.2155G>T                  | p.Gly719Cys        |
|       | c.2156G>A                  | p.Gly719Asp        |
|       | c.2156G>C                  | p.Gly719Ala        |
|       | c.2235_2249del             | p.Glu746_Ala750del |
|       | c.2236_2250del             | p.Glu746_Ala750del |
|       | c.2369C>T                  | p.Thr790Met        |
|       | c.2573T>G                  | p.Leu858Arg        |
|       | c.2582T>A                  | p.Leu861Gln        |
|       | c.2582T>G                  | p.Leu861Arg        |
|       | Exon 19 insertion/deletion |                    |
|       | Exon 20 insertion/deletion |                    |
| ERBB2 | Exon 20 insertion          |                    |
| IDH1  | c.394C>A                   | p.Arg132Ser        |
|       | c.394C>G                   | p.Arg132Gly        |
|       | c.394C>T                   | p.Arg132Cys        |
|       | c.395G>A                   | p.Arg132His        |
|       | c.395G>T                   | p.Arg132Leu        |
| KIT   | c.2447A>C                  | p.Asp816Ala        |
|       | c.2447A>G                  | p.Asp816Gly        |
|       | c.2447A>T                  | p.Asp816Val        |
| KRAS  | c.181C>A                   | p.Gln61Lys         |
|       | c.181C>G                   | p.Gln61Glu         |
|       | c.181C>T                   | p.Gln61X           |
|       | c.182A>C                   | p.Gln61Pro         |
|       | c.182A>G                   | p.Gln61Arg         |
|       | c.182A>T                   | p.Gln61Leu         |
|       | c.183A>C                   | p.Gln61His         |
|       | c.183A>T                   | p.Gln61His         |
|       | c.34G>A                    | p.Gly12Ser         |
|       | c.34G>C                    | p.Gly12Arg         |
|       | c.34G>T                    | p.Gly12Cys         |
|       | c.35G>A                    | p.Gly12Asp         |
|       | c.35G>C                    | p.Gly12Ala         |
|       | c.35G>T                    | p.Gly12Val         |
|       | c.37G>A                    | p.Gly13Ser         |

|        |           |              |
|--------|-----------|--------------|
|        | c.37G>C   | p.Gly13Arg   |
|        | c.37G>T   | p.Gly13Cys   |
|        | c.38G>A   | p.Gly13Asp   |
|        | c.38G>C   | p.Gly13Ala   |
|        | c.38G>T   | p.Gly13Val   |
| MAP2K1 | c.167A>C  | p.Gln56Pro   |
|        | c.171G>C  | p.Lys57Asn   |
|        | c.171G>T  | p.Lys57Asn   |
|        | c.199G>A  | p.Asp67Asn   |
| NOTCH1 | c.4724T>C | p.Leu1575Pro |
|        | c.4802T>C | p.Leu1601Pro |
| NRAS   | c.181C>A  | p.Gln61Lys   |
|        | c.181C>G  | p.Gln61Glu   |
|        | c.181C>T  | p.Glu61X     |
|        | c.182A>C  | p.Gln61Pro   |
|        | c.182A>G  | p.Gln61Arg   |
|        | c.182A>T  | p.Gln61Leu   |
|        | c.183A>C  | p.Gln61His   |
|        | c.183A>T  | p.Gln61His   |
|        | c.34G>A   | p.Gly12Ser   |
|        | c.34G>C   | p.Gly12Arg   |
|        | c.34G>T   | p.Gly12Cys   |
|        | c.35G>A   | p.Gly12Asp   |
|        | c.35G>C   | p.Gly12Ala   |
|        | c.35G>T   | p.Gly12Val   |
|        | c.37G>A   | p.Gly13Ser   |
|        | c.37G>C   | p.Gly13Arg   |
|        | c.37G>T   | p.Gly13Cys   |
|        | c.38G>A   | p.Gly13Asp   |
|        | c.38G>C   | p.Gly13Ala   |
|        | c.38G>T   | p.Gly13Val   |
| PIK3CA | c.1624G>A | p.Glu542Lys  |
|        | c.1624G>C | p.Glu542Gln  |
|        | c.1633G>A | p.Glu545Lys  |
|        | c.1633G>C | p.Glu545Gln  |
|        | c.1636C>A | p.Gln546Lys  |
|        | c.1636C>G | p.Gln546Glu  |
|        | c.1637A>C | p.Gln546Pro  |
|        | c.1637A>G | p.Gln546Arg  |
|        | c.1637A>T | p.Gln546Leu  |
|        | c.263G>A  | p.Arg88Gln   |
|        | c.3139C>T | p.His1047Tyr |
|        | c.3140A>G | p.His1047Arg |

|      |           |              |
|------|-----------|--------------|
|      | c.3140A>T | p.His1047Leu |
|      | c.3145G>A | p.Gly1049Ser |
|      | c.3145G>C | p.Gly1049Arg |
| PTEN | c.799delA | p.Lys267fs*9 |
|      | c.800delA | p.Lys267fs*9 |
|      | c.388C>G  | p.Arg130Gly  |
|      | c.388C>T  | p.Arg130X    |
|      | c.517C>T  | p.Arg173Cys  |
|      | c.697C>T  | p.Arg233X    |
| TP53 | c.524G>A  | p.Arg175His  |
|      | c.524G>T  | p.Arg175Leu  |
|      | c.733G>A  | p.Gly245Ser  |
|      | c.733G>C  | p.Gly245Arg  |
|      | c.733G>T  | p.Gly245Cys  |
|      | c.742C>G  | p.Arg248Gly  |
|      | c.742C>T  | p.Arg248Trp  |
|      | c.743G>A  | p.Arg248Gln  |
|      | c.743G>C  | p.Arg248Pro  |
|      | c.743G>T  | p.Arg248Leu  |
|      | c.817C>A  | p.Arg273Ser  |
|      | c.817C>G  | p.Arg273Gly  |
|      | c.817C>T  | p.Arg273Cys  |
|      | c.818G>A  | p.Arg273His  |
|      | c.818G>C  | p.Arg273Pro  |
|      | c.818G>T  | p.Arg273Leu  |
|      | c.916C>T  | p.Arg306X    |
